# Supplementary material for: Post-transcriptional generation of miRNA variants by multiple nucleotidyl transferases contributes to miRNA transcriptome complexity
Source: HighWire-hosted journal article supplement (doi:10.1101/gr.118059.110), 2011-08-03
Supplement: Wyman_SupFigS1.pdf [file Wyman_SupFigS1.pdf]

Supplementary Figure S1.

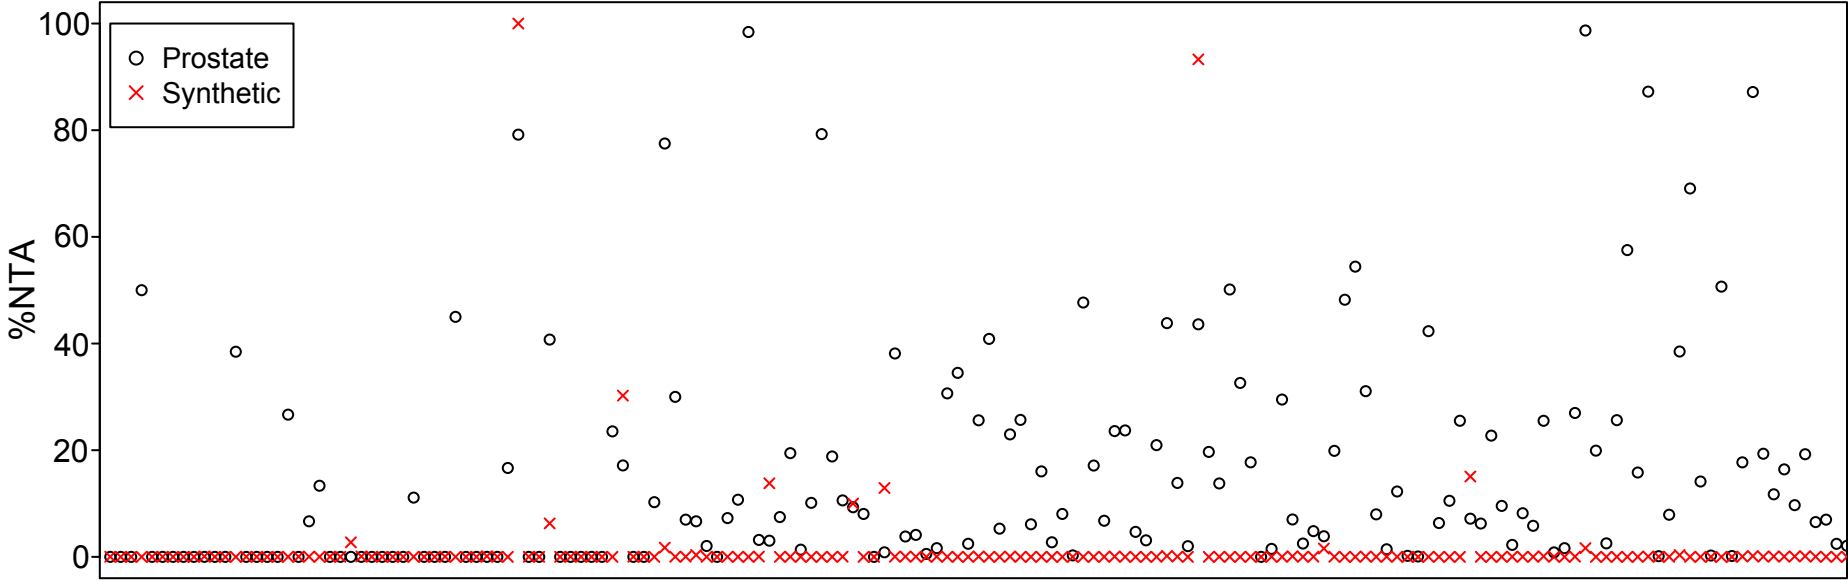

MicroRNAs sorted by increasing abundance in prostate small RNA sequencing dataset (filtered to  $\geq 10$  TMR)
