# Supplementary material for: Post-transcriptional generation of miRNA variants by multiple nucleotidyl transferases contributes to miRNA transcriptome complexity
Source: HighWire-hosted journal article supplement (doi:10.1101/gr.118059.110), 2011-08-03
Supplement: Wyman_SupTableS8.pdf [file Wyman_SupTableS8.pdf]

**Supplemental Table S8.** Nucleotidyl transferase mRNAs are robustly detected in HCT-116 cells by qRT-PCR and effectively depleted by siRNA transfection.

| <b>Gene</b> | <b>Ct in negative control siRNA cells</b> | <b>Ct in gene-specific nucleotidyl transferase siRNA cells</b> |
|-------------|-------------------------------------------|----------------------------------------------------------------|
| MTPAP       | 23.8                                      | 27.3                                                           |
| PAPD4       | 24.6                                      | 28.6                                                           |
| PAPD5       | 23.4                                      | 27.2                                                           |
| PAPOLG      | 25.8                                      | 27.9                                                           |
| TRNT1       | 24.8                                      | 27.4                                                           |
| TUT1        | 23.8                                      | 26.9                                                           |
| ZCCHC6      | 24.6                                      | 26.9                                                           |
| ZCCHC11     | 24.4                                      | 26.4                                                           |
